# Supplementary material
Source: ML conference proceedings conference paper supplement (https://openreview.net/forum?id=CuHymkHRus)
Supplement: supplementary_material [file attachment]

---

# Convolutional Monge Mapping Normalization for learning on biosignals

---

Anonymous Author(s)

Affiliation

Address

email

## Abstract

1 In many machine learning applications on signals and biomedical data, especially  
2 electroencephalogram (EEG), one major challenge is the variability of the data  
3 across subjects, sessions, and hardware devices. In this work, we propose a  
4 new method called Convolutional Monge Mapping Normalization (CMMN), which  
5 consists in filtering the signals in order to adapt their power spectrum density  
6 (PSD) to a Wasserstein barycenter estimated on training data. CMMN relies on  
7 novel closed-form solutions for optimal transport mappings and barycenters and  
8 provides individual test time adaptation to new data without needing to retrain  
9 a prediction model. Numerical experiments on sleep EEG data show that CMMN  
10 leads to significant and consistent performance gains independent from the neural  
11 network architecture when adapting between subjects, sessions, and even datasets  
12 collected with different hardware. Notably our performance gain is on par with  
13 much more numerically intensive Domain Adaptation (DA) methods and can be  
14 used in conjunction with those for even better performances.

## 15 1 Introduction

16 **Data shift in biological signals** Biological signals, such as electroencephalograms (EEG), often  
17 exhibit a significant degree of variability. This variability arises from various factors, including  
18 the recording setup (hardware specifications, number of electrodes), individual human subjects  
19 (variations in anatomies and brain activities), and the recording session itself (electrode impedance,  
20 positioning). In this paper, we focus on the problem of sleep staging which consists of measuring  
21 the activities of the brain and body during a session (here one session is done over a night of sleep)  
22 with electroencephalograms (EEG), electrooculograms (EOG), and electromyograms (EMG) [1] to  
23 classify the sleep stages. Depending on the dataset, the populations studied may vary from healthy  
24 cohorts to cohorts suffering from disease [2, 3, 4]. Different electrodes positioned in the front/back  
25 [3] or the side of the head [4] can be employed. Sleep staging is a perfect problem for studying the  
26 need to adapt to this variability that is also commonly denoted as data shift between domains (that  
27 can be datasets, subjects, or even sessions).

28 **Normalization for data shift** A traditional approach in machine learning to address data shifts  
29 between domains is to apply data normalization. Different approaches exist in the literature to  
30 normalize data. One can normalize the data per Session which allows to keep more within-session  
31 variability in the data [5]. If the variability during the session is too large, one can normalize  
32 independently each window of data (*e.g.*, 30 s on sleep EEG) [6], denoted as Sample in the following.  
33 It is also possible not to normalize the data, and let a neural network learn to discard non-pertinent  
34 variabilities helped with batch normalization [7, 8]. More recently, a number of works have explored  
35 the possibility of learning a normalization layer that is domain specific in order to better adapt their  
36 specificities [9, 10, 11, 12, 13, 14, 15]. However, this line of work usually requires to have labeled

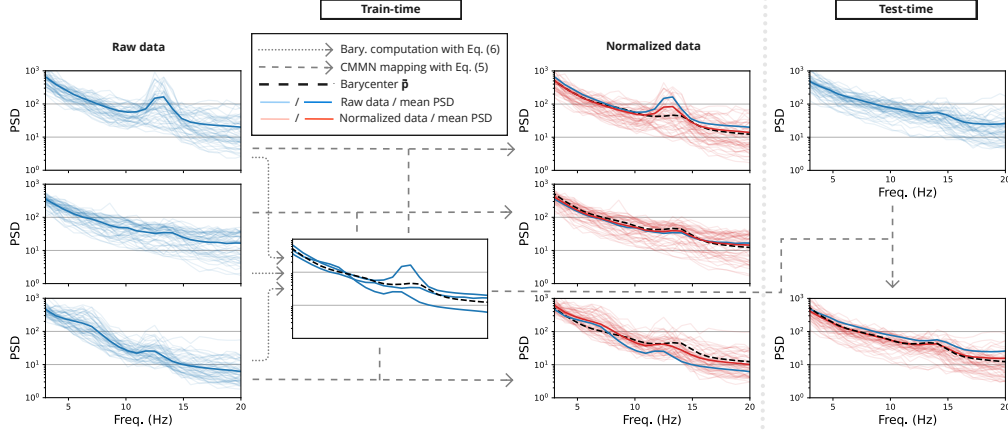

Figure 1: Illustration of the CMMN approach. At train-time the Wasserstein barycenter is estimated from 3 subjects/domains. The model is learned on normalized data. At test time the same barycenter is used to normalize test data and predict.

37 data from all domains (subjects) for learning which might not be the case in practice when the  
 38 objective is to automatically label a new domain without an expert.

39 **Domain Adaptation (DA) for data shift** Domain Adaptation is a field in machine learning that  
 40 aims at adapting a predictor in the presence of data shift but in the absence of labeled data in the target  
 41 domain. The goal of DA is to find an estimator using the labeled source domains which generalizes  
 42 well on the shifted target domain [16]. In the context of biological signals, DA is especially relevant  
 43 as it has the ability to fine-tune the predictor for each new target domain by leveraging unlabeled data.  
 44 Modern DA methods, inspired by successes in computer vision, usually try to reduce the shift between  
 45 the embeddings of domains learned by the feature extractor. To do that, a majority of the methods try  
 46 to minimize the divergence between the features of the source and the target data. Several divergences  
 47 can be considered for this task such as correlation distance [17], adversarial method [18], Maximum  
 48 Mean Discrepancy (MMD) distance [19] or optimal transport [20, 21]. Another adaptation strategy  
 49 consists in learning domain-specific batch normalization [9] in the embedding. Interestingly those  
 50 methods share an objective with the normalization methods: they aim to reduce the shift between  
 51 datasets. To this end, DA learns a complex invariant feature representation whereas normalization  
 52 remains in the original data space. Finally, test-time DA aims at adapting a predictor to the target  
 53 data without access to the source data [22], which might not be available in practice due to privacy  
 54 concerns or the memory limit of devices.

55 **Contributions** In this work we propose a novel and efficient normalization approach that can  
 56 compensate at test-time for the spectral variability of the domain signals. Our approach called  
 57 Convolutional Monge Mapping Normalization (CMMN), illustrated in Figure 1, uses a novel closed-  
 58 form to estimate a meaningful barycenter from the source domains. Then CMMN uses a closed-form  
 59 solution for the optimal transport Monge mapping between Gaussian random signals to align the  
 60 power spectrum density of each domain (source and target) to the barycenter. We emphasize that  
 61 CMMN is, to the best of our knowledge, the first approach that can adapt to complex spectral shifts in  
 62 the data without the need to access target datasets at training time or train a new estimator for each  
 63 new domain (which are the limits of DA).

64 We first introduce in section 2 the problem of optimal transport (OT) between Gaussian distributions,  
 65 and then propose a novel closed-form solution for the Wasserstein barycenter for stationary Gaussian  
 66 random signals. We then use this result to propose our convolutional normalization procedure in  
 67 section 3, where implementation details and related works are also discussed. Finally section 4  
 68 reports a number of numerical experiments on sleep EEG data, demonstrating the interest of CMMN for  
 69 adapting to new subjects, sessions, and even datasets, but also study its interaction with DA methods.

70 **Notations** Vectors are denoted by small cap boldface letters (*e.g.*,  $\mathbf{x}$ ), and matrices are denoted by  
 71 large cap boldface letters (*e.g.*,  $\mathbf{X}$ ). The element-wise product is denoted by  $\odot$ . The element-wise  
 72 power of  $n$  is denoted by  $\cdot^{\odot n}$ .  $[K]$  denotes the set  $\{1, \dots, K\}$ .  $|\cdot|$  denotes the absolute value. The

discrete convolution operator between two signals is denoted as  $*$ . Any parameters written with a small  $k$  (e.g.,  $\mathbf{X}_k$  or  $\mathbf{x}_i^k$ ) is related to the source domain  $k$  with  $1 \leq k \leq K$ . Any parameters written with a small  $t$  (e.g.,  $\mathbf{X}_t$  or  $\mathbf{x}_i^t$ ) is related to the target domain.

## 2 Signal adaptation with Optimal Transport

In this section, we first provide a short introduction to optimal transport between Gaussian Distributions, and then discuss how those solutions can be computed efficiently on stationary Gaussian signals, exhibiting a new closed-form solution for Wasserstein barycenters.

### 2.1 Optimal Transport between Gaussian distributions

**Monge mapping for Gaussian distributions** Let two Gaussian distributions  $\mu_s = \mathcal{N}(\mathbf{m}_s, \Sigma_s)$  and  $\mu_t = \mathcal{N}(\mathbf{m}_t, \Sigma_t)$ , where  $\Sigma_s$  and  $\Sigma_t$  are symmetric positive definite covariances matrices. OT between Gaussian distributions is one of the rare cases where there exists a closed-form solution. The OT cost, also called the Bures-Wasserstein distance when using a quadratic ground metric, is [23, 24]

$$\mathcal{W}_2^2(\mu_s, \mu_t) = \|\mathbf{m}_s - \mathbf{m}_t\|_2^2 + \text{Tr} \left( \Sigma_s + \Sigma_t - 2 \left( \Sigma_t^{\frac{1}{2}} \Sigma_s \Sigma_t^{\frac{1}{2}} \right)^{\frac{1}{2}} \right), \quad (1)$$

where the second term is called the Bures metric [25] between positive definite matrices. The OT mapping, also called Monge mapping, can be expressed as the following affine function :

$$m(\mathbf{x}) = \mathbf{A}(\mathbf{x} - \mathbf{m}_s) + \mathbf{m}_t, \quad \text{with} \quad \mathbf{A} = \Sigma_s^{-\frac{1}{2}} \left( \Sigma_s^{\frac{1}{2}} \Sigma_t \Sigma_s^{\frac{1}{2}} \right)^{\frac{1}{2}} \Sigma_s^{-\frac{1}{2}} = \mathbf{A}^T. \quad (2)$$

In practical applications, one can estimate empirically the means and covariances of the two distributions and plug them into the equations above. Interestingly, in this case, the concentration of the estimators has been shown to be in  $O(N^{-1/2})$ , where  $N$  is the number of samples, for the divergence estimation [26] and for the mapping estimation [27]. This is particularly interesting because optimal transport in the general case is known to be very sensitive to the curse of dimensionality with usual concentrations in  $O(N^{-1/D})$  where  $D$  is the dimensionality of the data [28].

**Wasserstein barycenter between Gaussian distributions** The Wasserstein barycenter that searches for an average distribution can also be estimated between multiple Gaussian distributions  $\mu_k$ . This barycenter  $\bar{\mu}$  is expressed as

$$\bar{\mu} = \arg \min_{\mu} \frac{1}{K} \sum_{k=1}^K \mathcal{W}_2^2(\mu, \mu_k). \quad (3)$$

Interestingly, the barycenter is still a Gaussian distribution  $\bar{\mu} = \mathcal{N}(\bar{\mathbf{m}}, \bar{\Sigma})$  [29]. Its mean  $\bar{\mathbf{m}} = \frac{1}{K} \sum_k \mathbf{m}_k$  can be computed as an average of the means of the Gaussians, yet there is no closed-form for computing the covariance  $\bar{\Sigma}$ . In practical applications, practitioners often use the following optimality condition from [29]

$$\bar{\Sigma} = \frac{1}{K} \sum_{k=1}^K \left( \bar{\Sigma}^{\frac{1}{2}} \Sigma_k \bar{\Sigma}^{\frac{1}{2}} \right)^{\frac{1}{2}}, \quad (4)$$

in a fixed point algorithm that consists in updating the covariance [30] using equation (4) above until convergence. Similarly to the distance estimation and mapping estimation, statistical estimation of the barycenter from sampled distribution has been shown to have a concentration in  $O(N^{-1/2})$  [31].

### 2.2 Optimal Transport between Gaussian stationary signals

We now discuss the special case of OT between stationary Gaussian random signals. In this case, the covariance matrices are Toeplitz matrices. A classical assumption in signal processing is that for a long enough signal, one can assume that the signal is periodic, and therefore the covariance matrix is a Toeplitz circulant matrix. The circulant matrix can be diagonalized by the Discrete Fourier Transform (DFT)  $\Sigma = \mathbf{F} \text{diag}(\mathbf{p}) \mathbf{F}^*$ , with  $\mathbf{F}$  and  $\mathbf{F}^*$  the Fourier transform operator and its inverse, and  $\mathbf{p}$  the Power Spectral Density (PSD) of the signal.

110 **Welch PSD estimation** As discussed above, there is a direct relation between the correlation matrix  
 111 of a signal and its PSD. In practice, one has access to a matrix  $\mathbf{X} \in \mathbb{R}^{N \times T}$  containing  $N$  signals of  
 112 length  $T$  that are samples of Gaussian random signals. In this case, the PSD  $\mathbf{p}$  of one random signal  
 113 can be estimated using the Welch periodogram method [32] with  $\hat{\mathbf{p}} = \frac{1}{N} \sum_{i=1}^N |\mathbf{F}\mathbf{x}_i|^{\odot 2}$  where  $|\cdot|$  is  
 114 the element-wise magnitude of the complex vector.

115 **Monge mapping between two Gaussian signals** The optimal transport mapping between Gaus-  
 116 sian random signals can be computed from (2) and simplified by using the Fourier-based eigen-  
 117 factorization of the covariance matrices. The mapping between two stationary Gaussian signals of  
 118 PSD respectively  $\mathbf{p}_s$  and  $\mathbf{p}_t$  can be expressed with the following convolution [27]:

$$m(\mathbf{x}) = \mathbf{h} * \mathbf{x}, \quad \text{with} \quad \mathbf{h} = \mathbf{F}^* \left( \mathbf{p}_t^{\odot \frac{1}{2}} \odot \mathbf{p}_s^{\odot -\frac{1}{2}} \right). \quad (5)$$

119 Note that the bias terms  $\mathbf{m}_s$  and  $\mathbf{m}_t$  do not appear above because one can suppose in practice that  
 120 the signals are centered (or have been high-pass filtered to be centered). The Monge mapping is a  
 121 convolution with a filter  $\mathbf{h}$  that can be efficiently estimated from the PSD of the two signals. It was  
 122 suggested in [27] as a Domain Adaptation method to compensate for convolutional shifts between  
 123 datasets. Nevertheless, this paper focused on theoretical results, and no evaluation on real signals  
 124 is reported. Moreover, the method proposed in [27] cannot be used between multiple domains  
 125 (as explored here). This is why in the following we propose a novel closed-form for estimating a  
 126 barycenter of Gaussian signals that we will use for the normalization of our CMMN method.

127 **Wasserstein barycenter between Gaussian signals** As discussed above, there is no known closed-  
 128 form solution for a Wasserstein barycenter between Gaussian distributions. Nevertheless, in the case  
 129 of stationary Gaussian signals, one can exploit the structure of the covariances to derive a closed-form  
 130 solution that we propose below.

131 **Lemma 1** Consider  $K$  centered stationary Gaussian signals of PSD  $\mathbf{p}_k$  with  $k \in [K]$ , the Wasser-  
 132 stein barycenter of the  $K$  signals is a centered stationary Gaussian signal of PSD  $\bar{\mathbf{p}}$  with:

$$\bar{\mathbf{p}} = \left( \frac{1}{K} \sum_{k=1}^K \mathbf{p}_k^{\odot \frac{1}{2}} \right)^{\odot 2}. \quad (6)$$

133 **PROOF.** Sketch of proof: the proof is a direct application of the optimality condition (4) of the  
 134 barycenter. The factorized covariances in (4), the matrix square root and the inverse can be simplified  
 135 as element-wise square root and inverse, recovering equation (11). We provide a detailed proof in the  
 136 appendix.

137 The closed-form solution is notable for several reasons. First, it is a novel closed-form solution that  
 138 avoids the need for iterative fixed-point algorithms and costly computations of matrix square roots.  
 139 Second, due to the Wasserstein space, it leads to an alternative to standard  $\ell_2$  averaging of PSD that  
 140 uses the square root as in the Hellinger distance [33], which is potentially more robust to outliers.  
 141 Note that while other estimators for PSD averaging could be used this choice is motivated here by the  
 142 fact that we use OT mappings and that the barycenter above is optimal *w.r.t.* those OT mappings.

### 143 3 Multi-source DA with Convolutional Monge Mapping Normalization

144 We now introduce the core contribution of the paper, that is an efficient method that allows to adapt to  
 145 the specificities of multiple domains and train a predictor that can generalize to new domains at test  
 146 time without the need to train a new model. We recall here that we have access to  $K$  labeled source  
 147 domains  $(\mathbf{X}_k, \mathbf{y}_k)_k$ . We assume that each domain contains  $N_k$  centered signals  $\mathbf{x}_i^k$  of size  $T$ .

148 **CMMN at train time** The proposed approach, illustrated in Figure 1 and detailed in Algorithm 1,  
 149 consists of the following steps:

- 150 1. Compute the PSD  $\hat{\mathbf{p}}_k$  for each source domain and use them to estimate the barycenter  $\hat{\mathbf{p}}$  with  
 151 (11).
- 152 2. Compute the convolutional mapping  $\mathbf{h}_k$  (5) between each source domain and the barycenter  $\bar{\mathbf{p}}$ .

153 3. Train a predictor on the normalized source data using the mappings  $\mathbf{h}_k$ :

$$\min_f \sum_{k=1}^K \sum_{i=1}^{N_k} L(y_i^k, f(\mathbf{h}_k * \mathbf{x}_i^k)) . \quad (7)$$

154

155 In order to keep notations simple, we consider here the case for a single sensor, but CMMN can be  
 156 extended to multi-sensor data by computing independently the Monge mapping for each sensor. Note  
 157 that steps 1 and 2 can be seen as a pre-processing and are independent of the training of the final  
 158 predictor, so CMMN can be used as pre-processing on any already existing learning framework.

159 **CMMN at test time** At test time, one has access to a  
 160 new unlabeled target domain ( $\mathbf{X}_t$ ) and the procedure,  
 161 detailed in Algorithm 2, is very simple. One can es-  
 162 timate the PSD  $\hat{\mathbf{p}}_t$  from the target domain unlabeled  
 163 data and compute the mapping  $\mathbf{h}_t$  to the barycenter  
 164  $\bar{\mathbf{p}}$ . Then the final predictor for the new domain  
 165 is  $\hat{f}^t(\mathbf{x}_t) = f(\mathbf{h}_t * \mathbf{x}_t)$ , that is the composition of  
 166 the domain-specific mapping to the barycenter of  
 167 the training data, and the already trained predictor  $f$ .  
 168 This is a very efficient test-time adaptation approach  
 169 that only requires an estimation of the target domain  
 170 PSD that can be done with few unlabeled target sam-  
 171 ples. Yet, it allows for a final predictor to adapt to the  
 172 spectral specificities of new domains thanks to the  
 173 convolutional Monge normalization.

174 **Numerical complexity and filter size** The numer-  
 175 ical complexity of the method is very low as it only  
 176 requires to compute the PSD of the domains and the  
 177 barycenter in  $O\left(\sum_k^K N_k T \log(T)\right)$ . It is also im-

178 portant to note that in practice, the method allows for a size of normalization filter  $F$  that is different  
 179 (smaller) than the size  $T$  of the signals. This consists in practice in estimating the PSD using Welch  
 180 periodogram on signal windows of size  $F \leq T$  that can be extracted from the raw signal or from  
 181 already extracted fixed sized source training samples. Indeed, if we use  $F = T$  then the estimated  
 182 average PSD can be perfectly adapted by the mapping, yet using many parameters can lead to  
 183 overfitting which can be limited using a smaller filter size  $F \leq T$ . In fact, it is interesting to note  
 184 that the special case  $F = 1$  boils down to a scaling of the whole signal similar to what is done with a  
 185 simple z-score operation. This means that the filter size  $F$  is an hyperparameter that can be tuned on  
 186 the data. From an implementation point of view, one can use the Fast Fourier Transform (FFT) to  
 187 compute the convolution (for large filters) or the direct convolution, which both have very efficient  
 188 implementation on modern hardware (CPU and GPU).

189 **Related Works** CMMN is a computationally efficient approach that benefits from a wide array of  
 190 recent results in optimal transport and domain adaptation. The idea of using optimal transport to adapt  
 191 distributions was first proposed in [34]. The idea to compute a Wasserstein barycenter of distributions  
 192 from multiple domains and use it for adaptation was introduced in [21]. Both of those approaches  
 193 have shown encouraging performances but were strongly limited by the numerical complexity of  
 194 solving the OT problems (mapping and barycenters) on large datasets ( $O(\sum_{k=1}^K N_k^3 \log(N_k))$ ) or at  
 195 least quadratic in  $N_k$  for entropic OT). CMMN does not suffer from this limitation as it relies on both  
 196 Gaussian and stationary signals assumptions that allow to estimate all the parameters for a complexity  
 197  $O(\sum_{k=1}^K N_k \log(N_k))$  linear with the number of samples  $N_k$ , and quasi-linear in dimensionality of  
 198 the signals  $T$ . The use of Gaussian modeling and convolutional Monge mapping for DA was first  
 199 proposed in [27] but the paper was mostly theoretical and only focus on the standard 2-domain DA  
 200 problem whereas CMMN handles multi-source and provides test-time adaptation.  
 201 Finally CMMN also bears resemblance with the convolutional normalization layer proposed in [11] that  
 202 also uses the FFT for fast implementation. Yet, it needs to be trained using labeled source and target  
 203 data, which prevents its use on DA at test time on new unseen domains.

---

#### Algorithm 1: Train-Time CMMN

---

**Input:**  $f, F, \{\mathbf{X}_k\}_k^K$   
**for**  $k = 1 \rightarrow K$  **do**  
 |  $\hat{\mathbf{p}}_k \leftarrow$  Welch PSD estimation of  $\mathbf{X}_k$   
**end**  
 $\bar{\mathbf{p}} \leftarrow$  Compute barycenter with (11)  
**for**  $k = 1 \rightarrow K$  **do**  
 |  $\mathbf{h}_k \leftarrow$  Compute mapping from (5)  
**end**  
 $\hat{f} \leftarrow$  Train on adapted data with (7)  
**return**  $\hat{f}, \bar{\mathbf{p}}$

---



---

#### Algorithm 2: Test-Time CMMN

---

**Input:**  $\hat{f}, \bar{\mathbf{p}}, \mathbf{X}_t$   
 $\hat{\mathbf{p}}_t \leftarrow$  Welch PSD estimation of  $\mathbf{X}_t$   
 $\mathbf{h}_t \leftarrow$  compute mapping from 5  
**return**  $\hat{\mathbf{y}}_t = \hat{f}(\mathbf{h}_t * \mathbf{X}_t)$

---

## 4 Numerical experiments

In this section, we evaluate CMMN on the clinical application of sleep stage classification from EEG signals with [6, 35]. We first compare CMMN to classical normalization methods and to subject-specific normalizations. Next, we illustrate the behavior of CMMN when used with different neural network architectures, and study the effect of CMMN on low-performing subjects. Finally, we study the use of CMMN in conjunction with domain adaptation approaches. In order to promote research reproducibility, all the code is available in the supplementary material and the datasets used are publicly available.

### 4.1 Experimental setup

**Sleep staging datasets** We use three publicly available datasets: Physionet (a.k.a SleepEDF) [3], SHHS [4, 36] and MASS [2]. On all datasets, we want to perform sleep staging from 2-channels EEG signals. The considered EEG channels are 2 bipolar channels, Fpz-Cz and Pz-Cz that have been known to provide discriminant information for sleep staging. Note that those channels were not available on the SHHS dataset, and we used the C3-A2 and C4-A1 instead. This brings another level of variability in the data. More details about the datasets are available as supplementary material.

**Pre-processing** For all experiments, we keep 60 subjects of each dataset and the two EEG channels. The same pre-processing is applied to all sensors. First, the recordings are low-pass filtered with a 30 Hz cutoff frequency, then the signals are resampled to 100 Hz. Then we extract 30 s epochs having a unique class. This pre-processing is common in the field [6, 37]. All the data extraction and the pre-processing steps are done with MNE-BIDS [38] and MNE-Python [39].

**Neural network architectures and training** Many neural network architectures dedicated to sleep staging have been proposed [8, 7, 40]. In the following, we choose to focus on two architectures: Chambon [6] and DeepSleepNet [7]. For both architectures, we use the implementation from brain-decode [41]. Chambon is an end-to-end neural network proposed to deal with multivariate time series and is composed of two convolutional layers with non-linear activation functions. DeepSleepNet is a more complex model with convolutional layers, non-linear activation functions, and a Bi-LSTM to model temporal sequences.

We use the Adam optimizer with a learning rate of  $10^{-3}$  for Chambon and  $10^{-4}$  with a weight decay of  $1 \times 10^{-3}$  for DeepSleepNet. The batch size is set to 128 and the early stopping is done on a validation set corresponding to 20% of the subjects in the training set with a patience of 10 epochs. For all methods, we optimize the cross entropy with class weight, which amounts to optimizing for the balanced accuracy (BACC).

Various metrics are commonly used in the field such as Cohen’s kappa, F1-score, or Balanced Accuracy (BACC) [35, 6]. We report here the BACC score as it is a metric well adapted to unbalanced classification tasks such as sleep staging. We also report in some experiments the gain the balanced accuracy, when using CMMN, of the 20% worst performing domains/subjects in the target domain denoted as  $\Delta\text{BACC}@20$  in the following.

**Filter size and sensitivity analysis for CMMN** Our method has a unique hyperparameter that is the size of the filter  $F$  used. In our experiments, we observed that, while this parameter has some impact, it is not critical and has quite a wide range of values ([8, 512]) that leads to systematic performance gains. We provide in supplementary material a sensitivity analysis of the performance for different adaptation scenarios (pairs of datasets). It shows that the value  $F = 128$  is a good trade-off that we used below for all experiments.

### 4.2 Comparison between different normalizations

We now evaluate the ability of CMMN to adapt to new subjects within and across datasets and also between two sessions of the same subject.

**Classical normalizations** We first compare CMMN to several classical normalization strategies. We compare, the use of raw data [7] letting the neural network learn the normalization from the data (None), standard normalization of each 30 s samples [6] that discard global trend along the session (Sample) and finally normalization by session that consists in our case to perform normalization independently on each domain (Session) [5]. We train the Chambon neural network on the source

| Datasets \ Norm. | None [7]          | Sample [6] | Session [5] | CMMN              |
|------------------|-------------------|------------|-------------|-------------------|
| MASS→MASS        | 73.9 ± 1.4        | 75.1 ± 1.0 | 76.0 ± 2.4  | <b>76.2 ± 2.2</b> |
| Phys.→Phys.      | 68.8 ± 2.8        | 69.2 ± 2.7 | 69.4 ± 3.0  | <b>71.7 ± 2.4</b> |
| SHHS→SHHS        | 55.1 ± 12.5       | 61.2 ± 3.8 | 60.8 ± 2.6  | <b>64.3 ± 2.7</b> |
| MASS→Phys.       | 55.9 ± 3.1        | 58.4 ± 2.4 | 57.5 ± 2.0  | <b>62.3 ± 1.5</b> |
| MASS→SHHS        | 45.8 ± 3.3        | 41.8 ± 3.6 | 37.4 ± 3.6  | <b>47.6 ± 4.0</b> |
| Phys.→MASS       | 63.8 ± 3.9        | 64.0 ± 2.7 | 63.7 ± 2.3  | <b>68.3 ± 2.5</b> |
| Phys.→SHHS       | <b>53.9 ± 3.2</b> | 45.6 ± 2.1 | 47.9 ± 1.8  | 51.6 ± 1.8        |
| SHHS→MASS        | 48.7 ± 4.8        | 57.0 ± 2.8 | 51.8 ± 6.4  | <b>64.5 ± 2.8</b> |
| SHHS→Phys.       | 52.6 ± 4.2        | 55.0 ± 2.7 | 52.4 ± 4.1  | <b>58.3 ± 1.7</b> |
| Mean             | 57.6 ± 4.3        | 58.6 ± 2.6 | 57.4 ± 3.1  | <b>62.7 ± 2.4</b> |

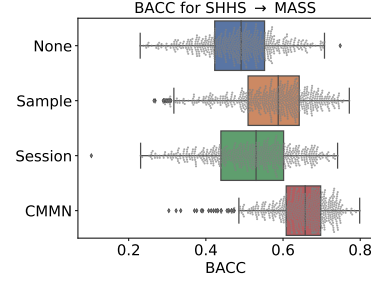

Table 1: Balanced accuracy (BACC) for different normalizations and different train/test dataset pairs (left). Boxplot for all normalization approaches on the specific pair SHHS→MASS (right). CMMN outperforms other normalizations.

| Normalization | BACC              |
|---------------|-------------------|
| No Adapt      | 73.7 ± 0.7        |
| Conv [11]     | 67.5 ± 2.7        |
| Norm [11]     | 69.4 ± 1.6        |
| ConvNorm [11] | 68.1 ± 1.3        |
| CMMN          | <b>74.8 ± 0.6</b> |

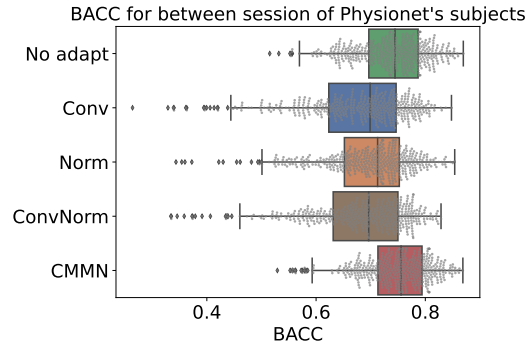

Table 2: Balanced accuracy (BACC) for different subject-specific normalizations and CMMN (left). Boxplot for all normalization approaches (right). CMMN outperforms subject-specific normalizations.

254 data of one dataset and evaluate on the target data of all other datasets for different splits.  
 255 The BACC for all dataset pairs and normalization are presented in the Table 1. The three classical  
 256 normalizations have similar performances with a slight edge for Sample on average. All those  
 257 approaches are outperformed by CMMN in 8 out of 9 dataset pairs with an average gain of 4% w.r.t.  
 258 the best performing Sample. This is also visible on the Boxplot on the right where the BACC for all  
 259 subjects/domains (*i.e.*, points) is higher for CMMN. Since the very simple Sample normalization is the  
 260 best-performing competitor, we used it as a baseline called No Adapt in the following.

261 **Domain specific normalization** We have shown above that the CMMN approach allows to better  
 262 cope with distribution shifts than standard data normalizations. This might be explained by the  
 263 fact that CMMN normalization is domain/subject specific. This is why we now compare to several  
 264 existing domain-specific normalizations. To do this we adapt the method of Liu *et al.* [11] which  
 265 was designed for image classification. We implemented domain-specific convolution layers (Conv),  
 266 batch normalization (Norm), or both (ConvNorm). In practice, we have one layer per domain that  
 267 is trained (jointly with the predictor  $f$ ) only on data from the corresponding domain. The limit  
 268 of domain-specific normalization is that all test domains must be represented in the training set.  
 269 Otherwise, if a new domain arrives in the test set, no layer specific to that domain will have been  
 270 trained.

271 To be able to compare these methods to CMMN, we use for this section the Physionet dataset for which  
 272 two sessions are available for some subjects. The first sessions are considered as the training set  
 273 where the domains are the subjects and the second sessions are split between the validation set (20%)  
 274 and the test set (80%). The validation set is used to do the early stopping, and validate the kernel size  
 275 of the subject-specific convolution for Conv and ConvNorm.

276 We can see in Table 2 that for cross-session adaptation, the gain with CMMN is smaller than previous  
 277 results (1% BACC gain), which can be explained by the presence of subjects data in both domains  
 278 resulting in a smaller shift between distribution. However, CMMN outperforms all other subject-specific  
 279 normalizations which are struggling to improve the results (*i.e.*, around 4% of BACC loss).

| Architecture | Chambon [6] |                   | DeepSleepNet [7]  |                   |
|--------------|-------------|-------------------|-------------------|-------------------|
|              | No Adapt    | CMMN              | No Adapt          | CMMN              |
| MASS→MASS    | 75.1 ± 1.0  | <b>76.2 ± 2.2</b> | <b>73.3 ± 1.7</b> | 73.1 ± 2.6        |
| Phys.→Phys.  | 69.2 ± 2.7  | <b>71.7 ± 2.4</b> | 66.5 ± 2.5        | <b>69.4 ± 2.5</b> |
| SHHS→SHHS    | 61.2 ± 3.8  | <b>64.3 ± 2.7</b> | 58.7 ± 2.3        | <b>60.1 ± 3.5</b> |
| MASS→Phys.   | 58.4 ± 2.4  | <b>62.3 ± 1.5</b> | 50.1 ± 2.4        | <b>54.5 ± 1.2</b> |
| MASS→SHHS    | 41.8 ± 3.6  | <b>47.6 ± 4.0</b> | 38.3 ± 2.6        | <b>47.8 ± 2.4</b> |
| Phys.→MASS   | 64.0 ± 2.7  | <b>68.3 ± 2.5</b> | 59.5 ± 1.0        | <b>62.1 ± 1.9</b> |
| Phys.→SHHS   | 45.6 ± 2.1  | <b>51.6 ± 1.8</b> | 45.2 ± 2.2        | <b>48.6 ± 1.6</b> |
| SHHS→MASS    | 57.0 ± 2.8  | <b>64.5 ± 2.8</b> | 51.2 ± 5.9        | <b>56.8 ± 6.1</b> |
| SHHS→Phys.   | 55.0 ± 2.7  | <b>58.3 ± 1.7</b> | 48.6 ± 5.8        | <b>54.7 ± 6.8</b> |
| Mean         | 58.6 ± 2.6  | <b>62.7 ± 2.4</b> | 54.6 ± 2.9        | <b>58.6 ± 3.2</b> |

Table 3: Balanced accuracy (BACC) for different train/test dataset pairs and for different architectures (Chambon/DeepSleepNet). CMMN works independently of the network architecture.

### 4.3 Study of the performance gain: neural architecture and human subjects

Previous experiments have shown the superiority of CMMN over all the other normalizations. In this section, we study the behavior of CMMN on different neural network architectures and study which subject gains the most performance gain.

**Performance of CMMN with different architectures** In addition to Chambon that was used in the previous experiments, we now evaluate CMMN considering a different network architecture: DeepSleepNet [7]. The results for both architectures are reported in Table 3, where CMMN is consistently better for both architectures. Notably, the only configuration where the gain is limited is MASS→MASS with DeepSleepNet because MASS is the easiest dataset with less variability than other pairs. Finally, we were surprised to see that DeepSleepNet does not perform as well as Chambon on cross-dataset adaptation, probably due to overfitting caused by a more complex architecture.

**Performance gain on low-performing subjects** In medical applications, it is often more critical to have a model that has a low failure mode, rather than the best average accuracy. As a first step toward studying this, we report two scatter plots reported in Table 4 plotting the BACC for individual target subjects without adaptation as a function of the BACC with CMMN, for different architectures and dataset pairs. First, the majority of the subjects are above the axis  $x = y$ , which means that CMMN improves their score. But the most interesting finding is the large improvement for the low-performing subjects that can gain from 0.3 to 0.65 BACC.

We also provide in Table 4 the  $\Delta\text{BACC}@20$ , that is the average BACC gain on the 20% lowest performing subjects without adaptation. On average, both architectures increase by 7% the BACC on those subjects, when it is only increased by 4% for all subjects. Some  $\Delta\text{BACC}@20$  are even greater than 10% on some dataset pairs. These results show the consistency of the method on all subjects but also the huge impact on the more challenging ones.

### 4.4 Complementarity of CMMN with Domain Adaptation

We have shown in the previous experiments that CMMN is clearly the best normalization in many settings. But the main idea of CMMN is to adapt the raw signals to a common barycentric domain. Interestingly, many Domain Adaptation (DA) methods also try to reduce the discrepancies between datasets by learning a feature representation that is invariant to the domain. In this section, we compare the two strategies and investigate if they are complementary.

We implement the celebrated DA method DANN [18] that aims at learning a feature representation that is invariant to the domain using an adversarial formulation. Note that this DA approach is much more complex than CMMN because it requires to have access to the target data during training and a model needs to be trained for each new target domain. The choice of hyperparameters for DA methods is not trivial in the absence of target labels. But since we have access to several target domains, we propose to select the weight parameters for DANN using a validation on 20% of the target subjects [42]. Note that this is not a realistic setting since in real applications the target domains are usually



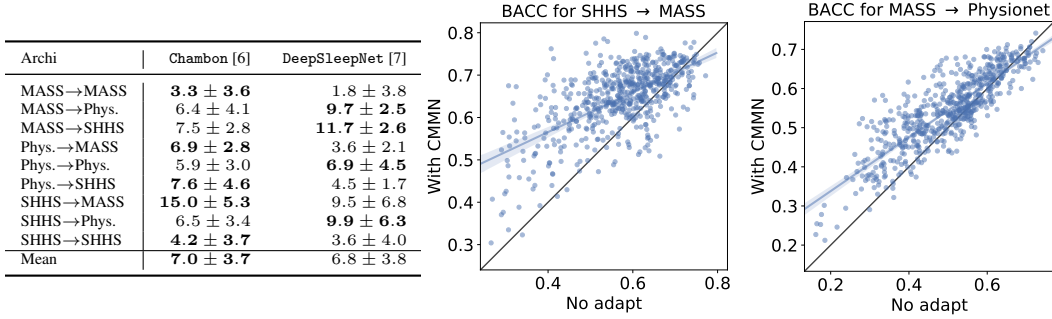

Table 4:  $\Delta\text{BACC}@20$  for different train/test dataset pairs and for different architectures (Chambon/DeepSleepNet) (left). Scatter plot of balanced accuracy (BACC) with No Adapt as a function of BACC with CMMN and the dataset pair SHHS  $\rightarrow$  MASS with Chambon (center) and on the dataset pair MASS  $\rightarrow$  Physionet with DeepSleepNet (right). CMMN leads to a big performance boost on the low-performing subjects.

| Adapt      | No Adapt   | BACC       |                   |                   |  |           | $\Delta\text{BACC}@20$ |                   |           |
|------------|------------|------------|-------------------|-------------------|--|-----------|------------------------|-------------------|-----------|
|            |            | DANN       | CMMN              | CMMN+DANN         |  |           | DANN                   | CMMN              | CMMN+DANN |
| MASS→Phys. | 59.2 ± 6.1 | 60.9 ± 1.0 | 62.9 ± 0.8        | <b>62.9 ± 1.2</b> |  | 2.0 ± 5.9 | 5.3 ± 5.8              | <b>5.5 ± 6.2</b>  |           |
| MASS→SHHS  | 44.5 ± 6.0 | 44.3 ± 2.1 | <b>50.3 ± 4.2</b> | 49.9 ± 1.9        |  | 4.2 ± 7.1 | 7.6 ± 2.9              | <b>10.4 ± 5.9</b> |           |
| Phys.→MASS | 65.3 ± 1.4 | 65.2 ± 0.7 | 68.9 ± 1.0        | <b>69.1 ± 1.0</b> |  | 0.4 ± 1.3 | <b>6.3 ± 2.0</b>       | 5.6 ± 2.7         |           |
| Phys.→SHHS | 43.1 ± 6.3 | 45.4 ± 2.6 | <b>50.0 ± 4.3</b> | 49.9 ± 2.4        |  | 2.8 ± 5.3 | 8.2 ± 5.7              | <b>9.7 ± 6.1</b>  |           |
| SHHS→MASS  | 59.9 ± 3.4 | 59.4 ± 1.1 | <b>66.5 ± 2.5</b> | 66.3 ± 0.9        |  | 0.4 ± 2.8 | <b>13.4 ± 3.0</b>      | 12.6 ± 2.7        |           |
| SHHS→Phys. | 57.1 ± 3.9 | 57.2 ± 2.2 | <b>61.6 ± 3.1</b> | 59.4 ± 2.6        |  | 4.1 ± 3.7 | 10.0 ± 6.9             | <b>10.9 ± 5.7</b> |           |
| Mean       | 54.9 ± 4.5 | 55.4 ± 1.6 | <b>60.0 ± 2.7</b> | 59.6 ± 1.7        |  | 2.3 ± 4.4 | 8.5 ± 4.4              | <b>9.1 ± 4.9</b>  |           |

Table 5: Balanced accuracy (BACC) and  $\Delta\text{BACC}@20$  for different train/test dataset pairs and for different adaptation methods. CMMN outperforms DANN and CMMN+DANN on average on all subjects. Combining CMMN DANN improves the lower-performing subjects.

not labeled, yet it is a way to compare the two approaches in a configuration favorable for DA. We focus on cross-dataset adaptation where many shifts are known to exist: different sensors (SHHS vs Physionet/MASS), doctor scoring criteria (SHHS/MASS vs Physionet), or brain activity (SHHS vs MASS vs Physionet).

We report in Table 5 the BACC and  $\Delta\text{BACC}@20$  for all dataset pairs and all combinations of CMMN and DANN with Chambon. First, we can see that the best approaches are clearly CMMN and CMMN+DANN. CMMN is better in BACC on 4/6 dataset pairs and CMMN+DANN is better in  $\Delta\text{BACC}@20$  on 4/6 dataset pairs. First, it is a very impressive performance for CMMN that is much simpler than DANN and again does not use target data when learning the predictor  $f$ . But it also illustrates the interest of CMMN+DANN especially for low-performing subjects.

## 5 Conclusion

We proposed in this paper a novel approach for normalization of bio-signals that can adapt to the spectral specificities of each domain while being a test-time adaptation method that does not require retraining a new model. The method builds on a new closed-form solution for computing Wasserstein barycenters on stationary Gaussian random signals. We showed that this method leads to a systematic performance gain on different configurations of data shift (between subjects, between sessions, and between datasets) and on different architectures. We also show that CMMN benefits greatly the subjects that had bad performances when trained jointly without sacrificing performance on the well-predicted subjects. Finally, we show that CMMN even outperforms DA methods, and can be used in conjunction with DA for even better results.

Future work will investigate the use of CMMN for other biomedical applications and study the use of the estimated filters  $\mathbf{h}_k$  as vector representations of the subjects that can be used for interpretability. Finally, we believe that a research direction worth investigating is the federated estimation of CMMN with the objective to learn an unbiased estimator in the context of differential privacy [43, 44].

## References

- [1] S. Stevens and G. Clark, “Chapter 6 - polysomnography,” in *Sleep Medicine Secrets*, D. STEVENS, ed., pp. 45–63. Hanley & Belfus, 2004.
- [2] C. O’Reilly, N. Gosselin, and J. Carrier, “Montreal archive of sleep studies: an open-access resource for instrument benchmarking and exploratory research,” *Journal of sleep research* **23** (06, 2014) .
- [3] A. L. Goldberger, L. A. Amaral, L. Glass, J. M. Hausdorff, P. C. Ivanov, R. G. Mark, J. E. Mietus, G. B. Moody, C.-K. Peng, and H. E. Stanley, “PhysioBank, PhysioToolkit, and PhysioNet: components of a new research resource for complex physiologic signals,” *circulation* **101** no. 23, (2000) e215–e220.
- [4] G.-Q. Zhang, L. Cui, R. Mueller, S. Tao, M. Kim, M. Rueschman, S. Mariani, D. Mobley, and S. Redline, “The national sleep research resource: Towards a sleep data commons,” *Journal of the American Medical Informatics Association* (08, 2018) 572–572.
- [5] A. Apicella, F. Isgro, A. Pollastro, and R. Prevete, “On the effects of data normalisation for domain adaptation on EEG data,” *arXiv:2210.01081 [cs.LG]*.
- [6] S. Chambon, M. Galtier, P. Arnal, G. Wainrib, and A. Gramfort, “A deep learning architecture for temporal sleep stage classification using multivariate and multimodal time series,” *arXiv:1707.03321 [stat.ML]*.
- [7] A. Supratak, H. Dong, C. Wu, and Y. Guo, “DeepSleepNet: A model for automatic sleep stage scoring based on raw single-channel EEG,” *IEEE Transactions on Neural Systems and Rehabilitation Engineering* **25** no. 11, nov1998–2008.
- [8] M. Perslev, S. Darkner, L. Kempfner, M. Nikolic, P. Jennum, and C. Igel, “U-Sleep: resilient high-frequency sleep staging,” *npj Digital Medicine* **4** (04, 2021) 72.
- [9] Y. Li, N. Wang, J. Shi, J. Liu, and X. Hou, “Revisiting batch normalization for practical domain adaptation,” *arXiv preprint arXiv:1603.04779* (2016) .
- [10] O. Chehab, A. Defossez, J.-C. Loiseau, A. Gramfort, and J.-R. King, “Deep recurrent encoder: A scalable end-to-end network to model brain signals,” *arXiv:2103.02339 [q-bio.NC]*.
- [11] S. Liu, X. Li, Y. Zhai, C. You, Z. Zhu, C. Fernandez-Granda, and Q. Qu, “Convolutional normalization: Improving deep convolutional network robustness and training,” *arXiv:2103.00673 [cs.CV]*.
- [12] X. Wei, A. A. Faisal, *et al.*, “2021 BEETL competition: Advancing transfer learning for subject independence and heterogenous eeg data sets,” in *Proceedings of the NeurIPS 2021 Competitions and Demonstrations Track*, D. Kiela, M. Ciccone, and B. Caputo, eds., vol. 176 of *Proceedings of Machine Learning Research*, pp. 205–219. PMLR, 06–14 dec, 2022.
- [13] R. Csaky, M. V. Es, O. P. Jones, and M. Woolrich, “Group-level brain decoding with deep learning,” *arXiv:2205.14102 [cs.LG]*.
- [14] R. J. Kobler, J. ichiro Hirayama, Q. Zhao, and M. Kawanabe, “SPD domain-specific batch normalization to crack interpretable unsupervised domain adaptation in EEG,” *arXiv:2206.01323 [cs.LG]*.
- [15] H. Phan, E. Heremans, O. Y. Chén, P. Koch, A. Mertins, and M. De Vos, “Improving automatic sleep staging via temporal smoothness regularization,” in *ICASSP 2023 - 2023 IEEE International Conference on Acoustics, Speech and Signal Processing (ICASSP)*, pp. 1–5. 2023.
- [16] J. Quinonero-Candela, M. Sugiyama, A. Schwaighofer, and N. D. Lawrence, *Dataset shift in machine learning*. Mit Press, 2008.
- [17] B. Sun and K. Saenko, “Deep CORAL: Correlation alignment for deep domain adaptation,” *arXiv:1607.01719 [cs.CV]*.
- [18] Y. Ganin, E. Ustinova, H. Ajakan, P. Germain, H. Larochelle, F. Laviolette, M. Marchand, and V. Lempitsky, “Domain-adversarial training of neural networks,” *arXiv:1505.07818 [stat.ML]*.
- [19] M. Long, Y. Cao, J. Wang, and M. I. Jordan, “Learning transferable features with deep adaptation networks,” *arXiv:1502.02791 [cs.LG]*.

- [20] B. B. Damodaran, B. Kellenberger, R. Flamary, D. Tuia, and N. Courty, “DeepJDOT: Deep joint distribution optimal transport for unsupervised domain adaptation,” *arXiv:1803.10081 [cs.CV]*.
- [21] E. F. Montesuma and F. M. N. Mboula, “Wasserstein barycenter for multi-source domain adaptation,” in *Proceedings of the IEEE/CVF conference on computer vision and pattern recognition*, pp. 16785–16793. 2021.
- [22] D. Chen, D. Wang, T. Darrell, and S. Ebrahimi, “Contrastive test-time adaptation,” *arXiv:2204.10377 [cs.CV]*.
- [23] R. Bhatia, T. Jain, and Y. Lim, “On the bures–wasserstein distance between positive definite matrices,” *Expositiones Mathematicae* **37** no. 2, (2019) 165–191.
- [24] G. Peyré and M. Cuturi, “Computational optimal transport,” *arXiv:1803.00567 [stat.ML]*.
- [25] P. J. Forrester and M. Kieburg, “Relating the Bures measure to the Cauchy two-matrix model,” *Communications in Mathematical Physics* **342** no. 1, (Oct, 2015) 151–187.
- [26] K. Nadjahi, A. Durmus, P. E. Jacob, R. Badeau, and U. Simsekli, “Fast approximation of the sliced-Wasserstein distance using concentration of random projections,” *Advances in Neural Information Processing Systems* **34** (2021) 12411–12424.
- [27] R. Flamary, K. Lounici, and A. Ferrari, “Concentration bounds for linear Monge mapping estimation and optimal transport domain adaptation,” *arXiv:1905.10155 [stat.ML]*.
- [28] N. Fournier and A. Guillin, “On the rate of convergence in wasserstein distance of the empirical measure,” *Probability theory and related fields* **162** no. 3–4, (2015) 707–738.
- [29] M. Agueh and G. Carlier, “Barycenters in the wasserstein space,” *SIAM Journal on Mathematical Analysis* **43** no. 2, (2011) 904–924, <https://doi.org/10.1137/100805741>, <https://doi.org/10.1137/100805741>.
- [30] Y. Mroueh, “Wasserstein style transfer,” *arXiv:1905.12828 [cs.LG]*.
- [31] A. Kroshnin, V. Spokoiny, and A. Suvorikova, “Statistical inference for Bures–Wasserstein barycenters,” *The Annals of Applied Probability* **31** no. 3, (2021) 1264–1298.
- [32] P. Welch, “The use of fast fourier transform for the estimation of power spectra: A method based on time averaging over short, modified periodograms,” *IEEE Transactions on Audio and Electroacoustics* **15** no. 2, (1967) 70–73.
- [33] R. Bhatia, S. Gaubert, and T. Jain, “Matrix versions of the hellinger distance,” *Letters in Mathematical Physics* **109** (2019) 1777–1804.
- [34] N. Courty, R. Flamary, and D. Tuia, “Domain adaptation with regularized optimal transport,” in *Machine Learning and Knowledge Discovery in Databases: European Conference, ECML PKDD 2014, Nancy, France, September 15–19, 2014. Proceedings, Part I 14*, pp. 274–289, Springer. 2014.
- [35] H. Phan, O. Y. Chen, M. C. Tran, P. Koch, A. Mertins, and M. D. Vos, “XSleepNet: Multi-view sequential model for automatic sleep staging,” *IEEE Transactions on Pattern Analysis and Machine Intelligence* **44** no. 09, (Sep, 2022) 5903–5915.
- [36] S. Quan, B. Howard, *et al.*, “The sleep heart health study: Design, rationale, and methods,” *Sleep* **20** (01, 1998) 1077–85.
- [37] J. B. Stephansen, A. N. Olesen, *et al.*, “Neural network analysis of sleep stages enables efficient diagnosis of narcolepsy,” *Nature Communications* **9** no. 1, (Dec, 2018) .
- [38] S. Appelhoff, M. Sanderson, *et al.*, “MNE-BIDS: Organizing electrophysiological data into the BIDS format and facilitating their analysis,” *Journal of Open Source Software* **4** no. 44, (2019) 1896.
- [39] A. Gramfort, M. Luessi, *et al.*, “MEG and EEG data analysis with MNE-Python,” *Frontiers in Neuroscience* **7** no. 267, (2013) 1–13.
- [40] E. Eldele, Z. Chen, C. Liu, M. Wu, C.-K. Kwok, X. Li, and C. Guan, “An attention-based deep learning approach for sleep stage classification with single-channel EEG,” *IEEE Transactions on Neural Systems and Rehabilitation Engineering* **29** (2021) 809–818.

- 442 [41] R. T. Schirrmeister, J. T. Springenberg, L. D. J. Fiederer, M. Glasstetter, K. Eggenberger,  
443 M. Tangermann, F. Hutter, W. Burgard, and T. Ball, “Deep learning with convolutional neural  
444 networks for EEG decoding and visualization,” *Human Brain Mapping* (Aug, 2017) .
- 445 [42] T. Salvador, K. Fatras, I. Mitliagkas, and A. Oberman, “A reproducible and realistic evaluation  
446 of partial domain adaptation methods,” *arXiv:2210.01210 [cs.CV]* .
- 447 [43] K. Wei, J. Li, M. Ding, C. Ma, H. H. Yang, F. Farokhi, S. Jin, T. Q. Quek, and H. V. Poor,  
448 “Federated learning with differential privacy: Algorithms and performance analysis,” *IEEE*  
449 *Transactions on Information Forensics and Security* **15** (2020) 3454–3469.
- 450 [44] P. Kairouz, H. B. McMahan, *et al.*, “Advances and open problems in federated learning,”  
451 *Foundations and Trends® in Machine Learning* **14** no. 1–2, (2021) 1–210.
- 452 [45] J. A. Hobson, “A manual of standardized terminology, techniques and scoring system for sleep  
453 stages of human subjects: A. Rechtschaffen and A. Kales (editors). (public health service, u.s.  
454 government printing office, washington, d.c., 1968, 58 p., \$4.00),” *Electroencephalography and*  
455 *Clinical Neurophysiology* **26** (1969) 644.
- 456 [46] C. Iber, S. Ancoli-Israel, A. Chesson, and S. Quan, “The AASM manual for the scoring of sleep  
457 and associated events: Rules, terminology and technical specifications,” *Westchester, IL:*  
458 *American Academy of Sleep Medicine* (01, 2007) .

## A Supplementary material

### A.1 Proof of the convolutional Wasserstein barycenter

PROOF. Consider  $K$  centered stationary Gaussian signals of covariance  $\Sigma_k \mathbf{p}_k$  (respectively PSD  $\mathbf{p}_k$ ) with  $k \in [K]$ , the Wasserstein barycenter of the  $K$  signals is a centered stationary Gaussian signal of PSD  $\bar{\mathbf{p}}$  with:

$$\bar{\Sigma} = \frac{1}{K} \sum_{k=1}^K \left( \bar{\Sigma}^{\frac{1}{2}} \Sigma_k \bar{\Sigma}^{\frac{1}{2}} \right)^{\frac{1}{2}} \quad (8)$$

The signals are supposed to be stationary. Therefore the covariance matrix is a Toeplitz circulant matrix. The circulant matrix can be diagonalized by the Discrete Fourier Transform (DFT)  $\Sigma = \mathbf{F} \text{diag}(\mathbf{p}) \mathbf{F}^*$ , with  $\mathbf{F}$  and  $\mathbf{F}^*$  the Fourier transform operator and its inverse, and  $\mathbf{p}$  the Power Spectral Density (PSD) of the signal. The above equation becomes:

$$\bar{\mathbf{p}} = \frac{1}{K} \sum_{k=1}^K \left( \bar{\mathbf{p}}^{\odot \frac{1}{2}} \odot \mathbf{p}_k \odot \bar{\mathbf{p}}^{\odot \frac{1}{2}} \right)^{\odot \frac{1}{2}} \quad (9)$$

The matrix square root and the inverse become element-wise square root and inverse. The equation becomes easier, and the term can be managed to isolate  $\bar{\mathbf{p}}$ :

$$\begin{aligned} \bar{\mathbf{p}} &= \frac{1}{K} \sum_{k=1}^K \left( \bar{\mathbf{p}}^{\odot \frac{1}{2}} \odot \mathbf{p}_k \odot \bar{\mathbf{p}}^{\odot \frac{1}{2}} \right)^{\odot \frac{1}{2}} \\ \bar{\mathbf{p}} &= \frac{1}{K} \sum_{k=1}^K \bar{\mathbf{p}}^{\odot \frac{1}{2}} \odot \mathbf{p}_k^{\odot \frac{1}{2}} \\ \bar{\mathbf{p}}^{\odot \frac{1}{2}} &= \frac{1}{K} \sum_{k=1}^K \mathbf{p}_k^{\odot \frac{1}{2}} \\ \bar{\mathbf{p}} &= \left( \frac{1}{K} \sum_{k=1}^K \mathbf{p}_k^{\odot \frac{1}{2}} \right)^{\odot 2} \end{aligned}$$

PROOF. A second possible proof is considering the optimization problem *w.r.t*  $\Sigma$ :

$$\bar{\Sigma} = \arg \min_{\Sigma} \sum_{k=1}^K \text{Tr} \left( \Sigma + \Sigma_k - 2 \left( \Sigma^{\frac{1}{2}} \Sigma_k \Sigma^{\frac{1}{2}} \right)^{\frac{1}{2}} \right). \quad (10)$$

As mentioned above, it is possible to use the PSD  $\mathbf{p}$  to transform the equation into an element-wise problem as before:

$$\begin{aligned} \bar{\mathbf{p}} &= \arg \min_{\mathbf{p}} \sum_{k=1}^K \left\| \mathbf{p} + \mathbf{p}_k - 2 \left( \mathbf{p}^{\frac{1}{2}} \odot \mathbf{p}_k \odot \mathbf{p}^{\frac{1}{2}} \right)^{\odot \frac{1}{2}} \right\|_1 \\ \bar{\mathbf{p}} &= \arg \min_{\mathbf{p}} \sum_{k=1}^K \left\| \mathbf{p} + \mathbf{p}_k - 2 \mathbf{p}^{\odot \frac{1}{2}} \odot \mathbf{p}_k^{\odot \frac{1}{2}} \right\|_1 \end{aligned} \quad (11)$$

After derivation, the  $\bar{\mathbf{p}}$  minimizing the optimization problem is given by:

$$\bar{\mathbf{p}} = \left( \frac{1}{K} \sum_{k=1}^K \mathbf{p}_k^{\odot \frac{1}{2}} \right)^{\odot 2} \quad (12)$$

## A.2 Computation

The training is done on Tesla V100-DGXS-32GB with Pytorch. We are considering the following train settings: Chambon architecture with a learning rate of  $1e^{-3}$  for Adam optimizer and a patience of 10 for the early stopping. The training for one dataset pair with ten different splits and seeds lasts approximately 1 hour. The data processing time with the CMMN is insignificant compared to the network’s computation time (a few minutes).

## A.3 Dataset descriptions

**SHHS** The Sleep Heart Health Study is a multi-center cohort study proposed by the National Heart Lung & Blood Institute [4, 36] to help detect cardiovascular disease and sleep disorders. This large dataset comprises 6441 subjects (age  $63.1 \pm 11.2$ ) from 1995 to 1998. Five sensors are available for each subject: 2 EEGs from C3-A2 and C4-A1 channels, left and right EOGs, and one EMG. The EEGs have a sampling rate of 125 Hz. The hypnograms were scored according to the Rechtschaffen and Kales criteria [45].

**MASS** The Montreal Archive of Sleep Studies comprised five different subsets of recordings. This paper focuses on the SS3 with recordings from 62 healthy subjects (age  $42.5 \pm 18.9$ ). For each subject, 20 EEGs, left and right EOGs, and 3 EMGs are available. We reduced the number of EEG channels to 2 bipolar channels, Fpz-Cz and Pz-Cz, obtained by montage reformatting. The EEGs have a sampling rate of 256 Hz. The MASS hypnograms were scored according to the AASM criteria [46].

**Physionet SleepEDF** This dataset comprises two subsets, one for the age effect in healthy subjects (SC) and one for the Temazepam effect on sleep (ST). We focused on the SC subset where 78 subjects are available (age  $28.7 \pm 2.9$ ). Each recording comprises 2 EEGs from Fpz-Cz and Pz-Cz channels, 1 EOG, and 1 EMG. The EEGs have a sampling rate of 100 Hz. Some of the subjects have two sessions of PSGs available. The hypnograms were scored according to the Rechtschaffen and Kales criteria [45]. The stages N3 and N4 have been merged for the following.

## A.4 Sensitivity analysis to the filter size

Several adaptations across different dataset pairs are done to compare the effect of the filter size. The smallest filter size means no transformation, and the largest size corresponds to a perfect transformation between the two signals. For each parameter, ten training are done over data from the source dataset and then tested over data from the target dataset.

To evaluate the benefit of the method, we measure the  $\Delta\text{BACC}$  corresponding to the difference between the balanced accuracy score with monge mapping and the balanced accuracy score without monge mapping (*i.e.*, using `Sample` normalization). The Figure 2 shows the evaluation of  $\Delta\text{BACC}$  with filter size for different dataset pairs. The slightest improvement is for adaptation between the same dataset, which is logical because there is less difference to compensate between the subjects. And the best improvement is for the most challenging task, adaptation between datasets with different sensors (MASS/Physionet  $\rightarrow$  SHHS). The mapping did not capture enough information for the smallest filter size to reduce the difference between distributions. On the other hand, the bigger the distribution gap between datasets, the bigger the filter size helps to adapt. Indeed, for an adaptation between the same dataset, having a filter size close to the sample size decreases the performance (see MASS  $\rightarrow$  MASS, Physionet  $\rightarrow$  Physionet), while for an adaptation between two different or very different datasets, increasing the filter size causes the performance to remain the same (MASS  $\leftrightarrow$  Physionet) or even increases the scores considerably (MASS/Physionet  $\rightarrow$  SHHS).

## A.5 Boxplot of BACC for different data normalizations, different architectures, and different dataset pairs

As shown in the experimental section of the paper, CMMN outperforms standard normalization (`Session` or `Sample`) for different architectures. Here we provide more boxplots for other dataset pairs than in the main article. For Chambon, the figure 3f shows again that CMMN outperforms other normalizations except with dataset SHHS in target. Indeed, if CMMN is still better than `Sample` and

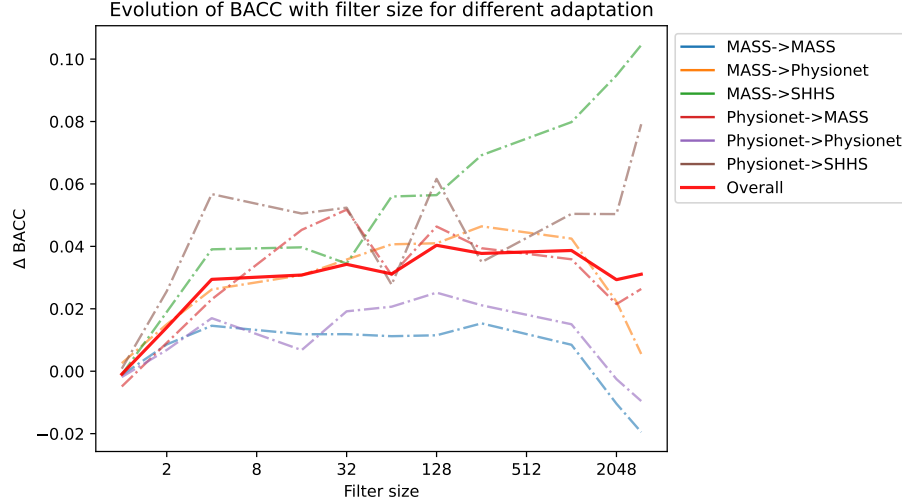

Figure 2: Evolution of the  $\Delta BACC$  (BACC - BACC without mapping) for different filter sizes for different adaptation problems

Session, using no normalization is better for this experimental setting. SHHS is the most different dataset since the sensors used differ from Physionet and MASS, which can explain this difference. Even when SHHS is in train, CMMN is better than None.

The results for DeepSleepNet in figure 4f are slightly different. If CMMN is still the better performer overall, the best standard normalization is None. Using no normalization is better in 5/6 dataset pairs over Sample and Session. These results were expected since no normalization was used in the paper proposing DeepSleepNet [7].

For the sake of simplicity, we used Sample normalization before CMMN and also for the baseline No Adapt. even for DeepSleepNet.

#### A.6 Scatterplot for different architectures and different dataset pairs

One significant benefit of CMMN is to have a massive impact on low-performing subjects. The scatter plots of balanced accuracy (BACC) with No Adapt as a function of BACC with CMMN emphasize this effect. In this section, the plots in figure 5f and figure 6f show the increase in all subjects. For both architectures, the axis of the linear regression is always above the axis  $x = y$ . The differences between the two axes are generally higher for lower performances, which means that the worst the performance is, the higher the increase is. For the eccentric dots on the left (*i.e.*, low-performing subjects), the increase is generally around 8% (see Table 4). When SHHS is the training set, low-performing subjects get a considerable boost. On the other hand, for Physionet  $\leftrightarrow$  MASS with Chambon, some subjects lose accuracy, but it remains rare compared to the average gain on all subjects.

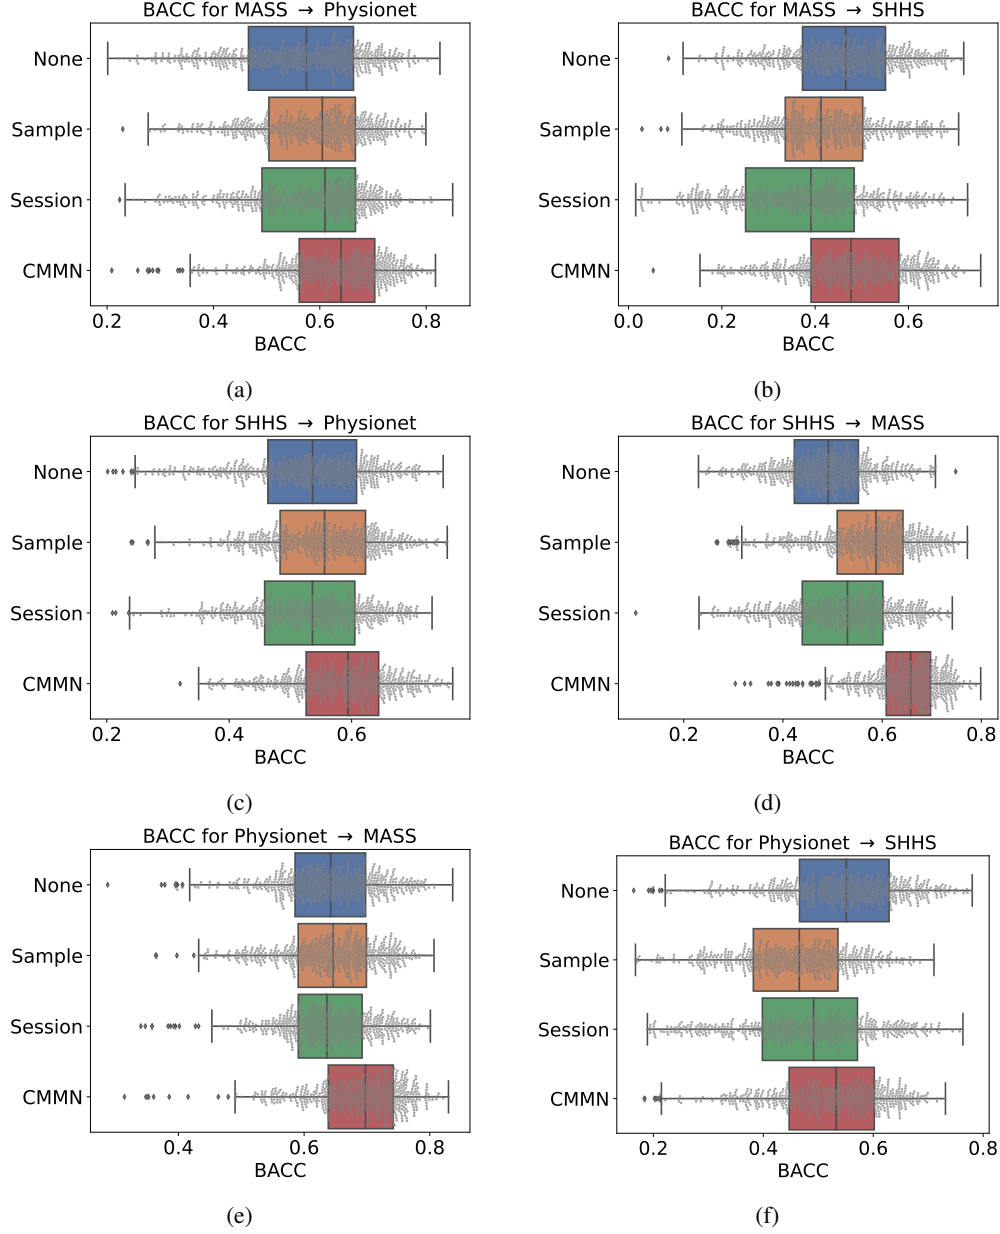

Figure 3: Boxplot of balanced accuracy (BACC) for different normalizations and different train/test dataset pairs with Chambon.



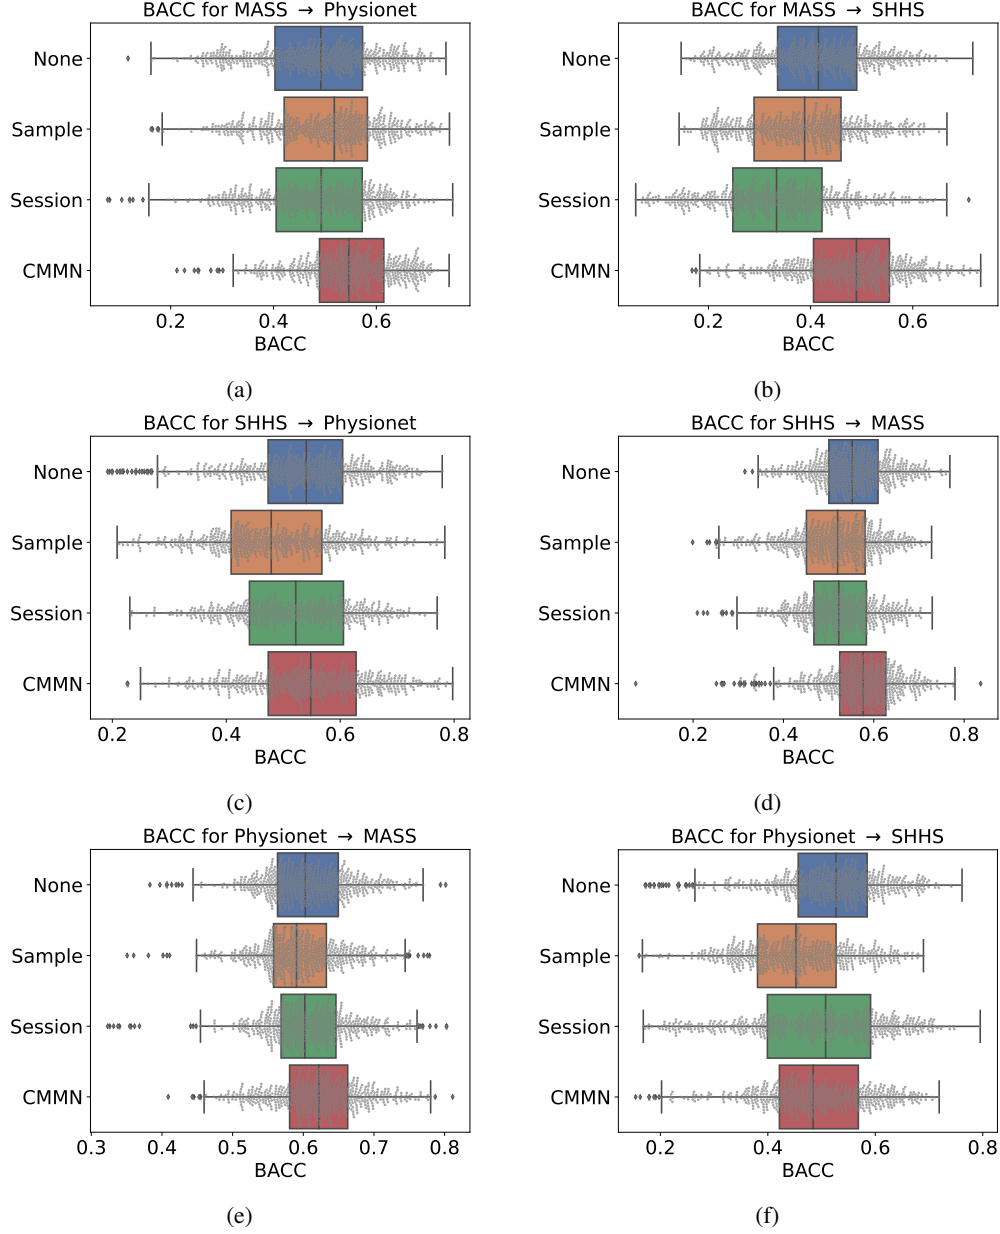

Figure 4: Boxplot of balanced accuracy (BACC) for different normalizations and different train/test dataset pairs with DeepSleepNet.

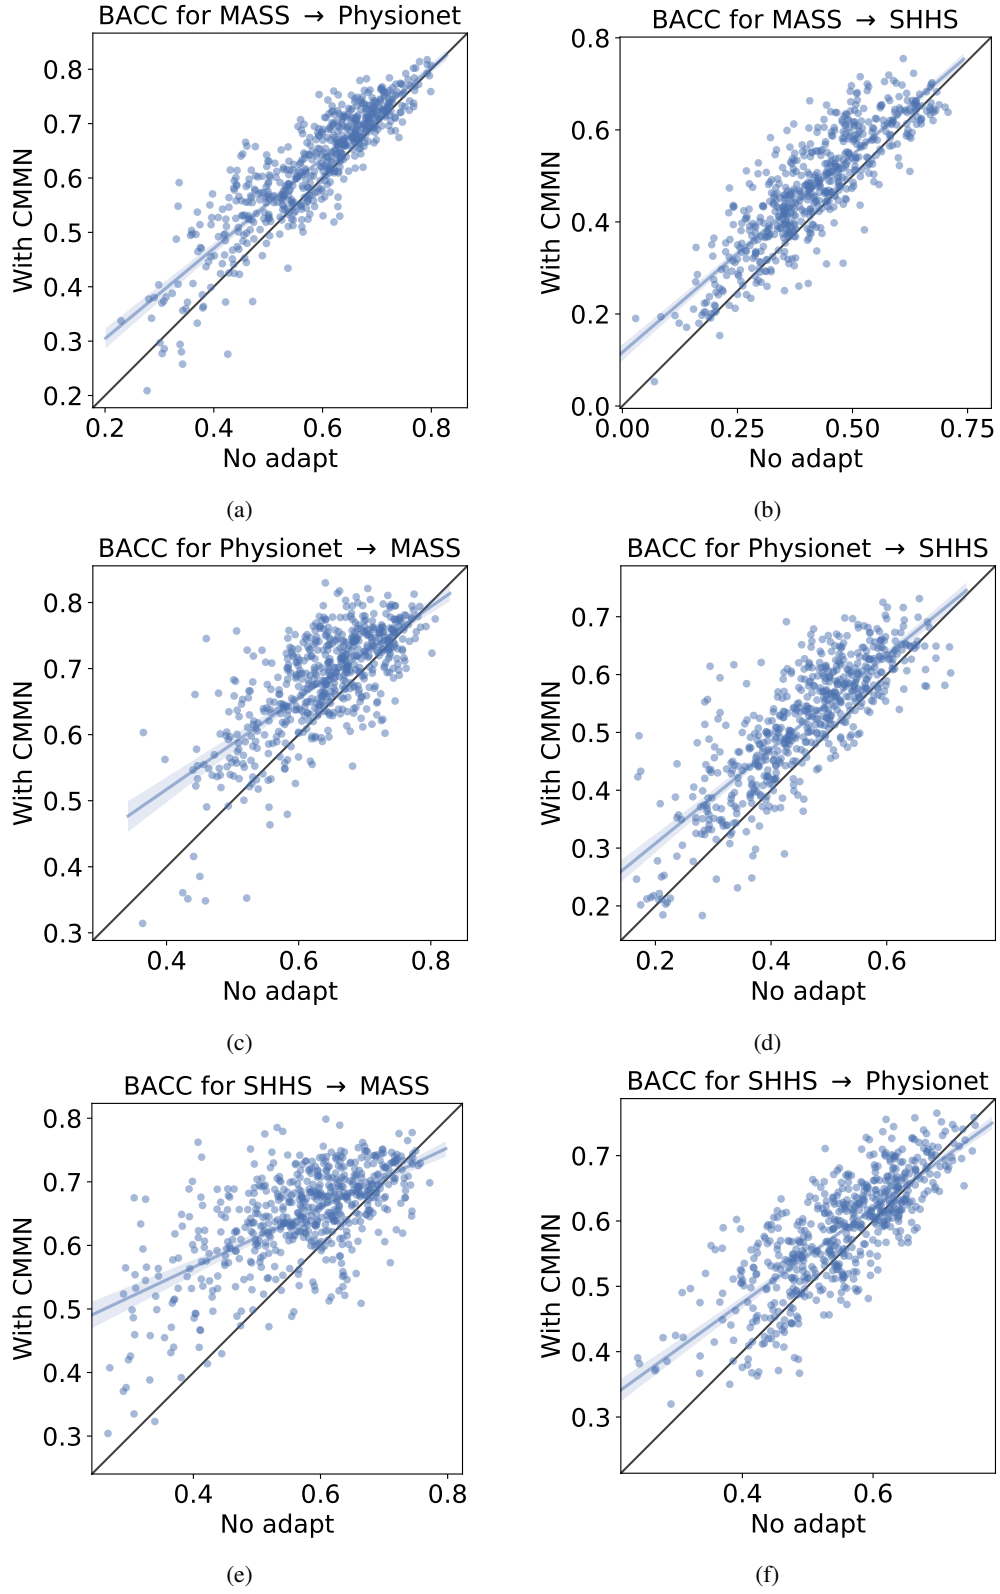

Figure 5: Scatter plot of balanced accuracy (BACC) with No Adapt as a function of BACC with CMMN for different dataset pairs with Chambon.

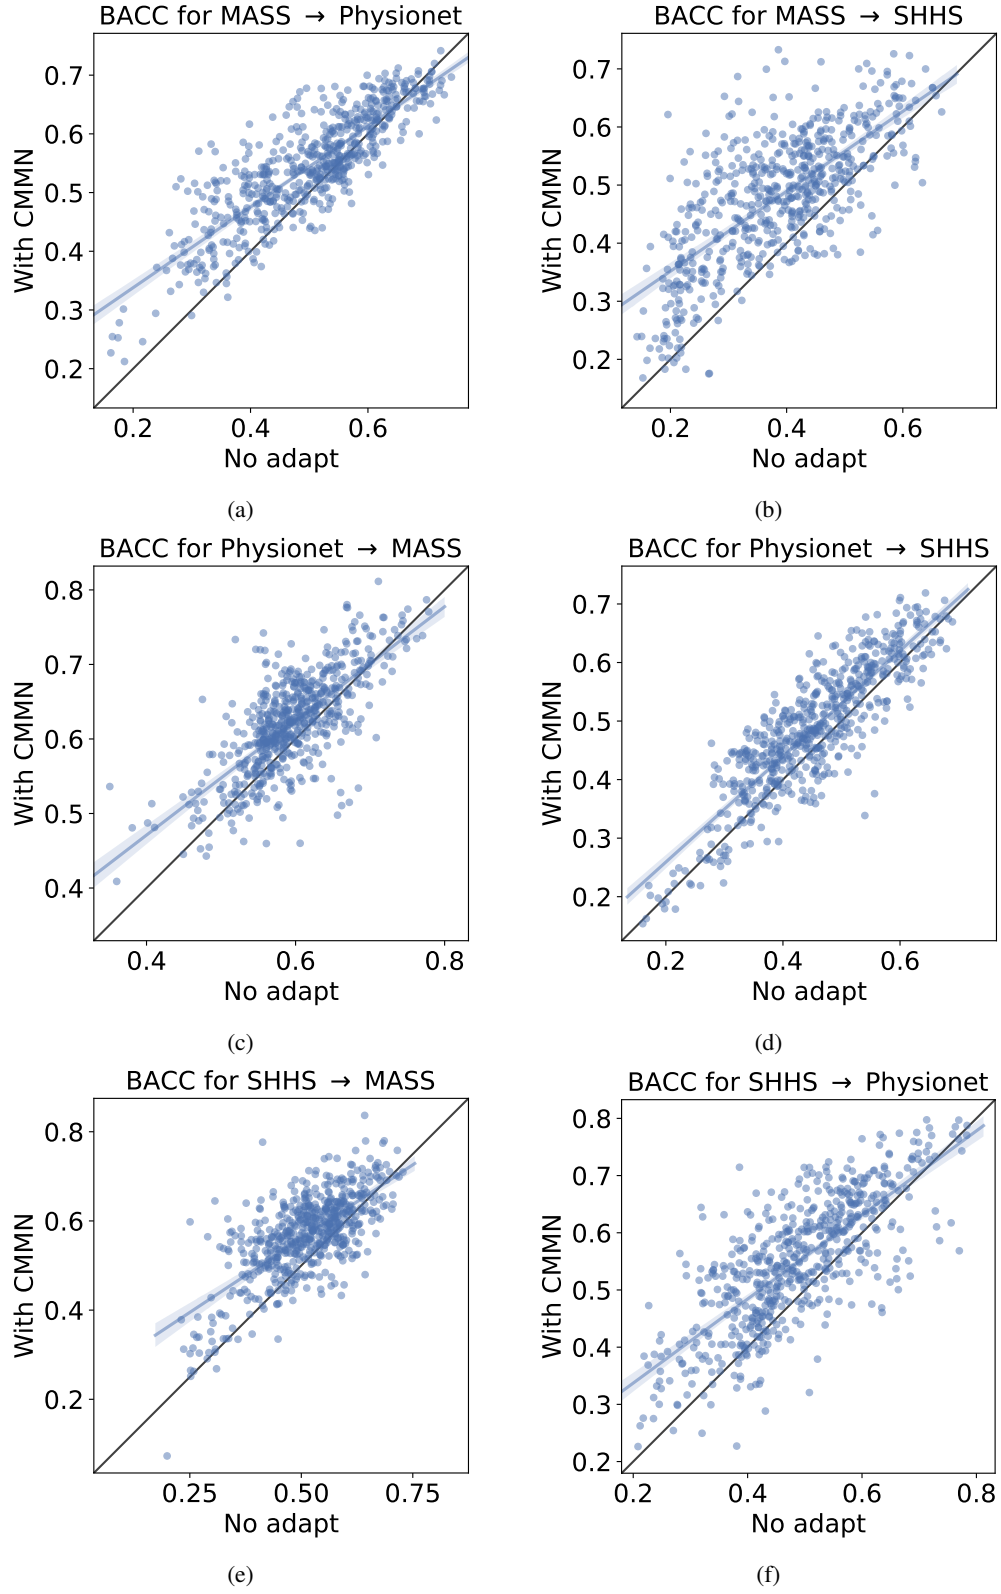

Figure 6: Scatter plot of balanced accuracy (BACC) with No Adapt as a function of BACC with CMMN for different dataset pairs with DeepSleepNet
